# Supplementary material
Source: ML conference proceedings conference paper supplement (https://proceedings.neurips.cc/paper_files/paper/2017/hash/dab49080d80c724aad5ebf158d63df41-Abstract.html)
Supplement: Supplementary file [file dab49080d80c724aad5ebf158d63df41-Supplemental.zip]

## A KL divergence for the truncated log-normal distribution

We need to introduce some notation to work with the truncated normal distribution. Consider a distribution  $\text{tN}(x | \mu, \sigma^2, a, b)$ , where  $\mu$  and  $\sigma$  are the mean and the standard deviation of the corresponding normal distribution before truncation, and  $a$  and  $b$  are the left and right truncation thresholds respectively. Denote

$$\alpha = \frac{a - \mu}{\sigma} \quad \beta = \frac{b - \mu}{\sigma} \quad Z = \Phi(\beta) - \Phi(\alpha)$$

Now we can calculate the KL divergence between a truncated log-normal distribution  $q(\theta^i)$  and a log-uniform distribution  $p(\theta^i)$  with a bounded support  $\theta^i \in [e^a, e^b]$ .

$$\begin{aligned} \text{KL}(q(\theta^i) \| p(\theta^i)) &= \text{KL}(q(\log \theta^i) \| p(\log \theta^i)) = \\ &= \text{KL}(\text{tN}(x | \mu, \sigma^2, a, b) \| \mathcal{U}(x | a, b)) = \int_a^b \text{tN}(x | \mu, \sigma^2, a, b) \log \frac{\text{tN}(x | \mu, \sigma^2, a, b)}{\mathcal{U}(x | a, b)} dx = \\ &= -\mathcal{H}(\text{tN}(x | \mu, \sigma^2, a, b)) + \log(b - a) \end{aligned}$$

Entropy for the truncated normal distribution is

$$\begin{aligned} \mathcal{H}(\text{tN}(x | \mu, \sigma^2, a, b)) &= \log(\sqrt{2\pi e} \sigma Z) + \frac{\alpha \phi(\alpha) - \beta \phi(\beta)}{2Z} \\ \phi(x) &= \frac{1}{\sqrt{2\pi}} \exp\left(-\frac{1}{2}x^2\right) \\ \Phi(x) &= \frac{1}{2}(1 + \text{erf}(x/\sqrt{2})) \end{aligned}$$

Finally, we obtain

$$\begin{aligned} \text{KL}(q(\theta_i | \mu_i, \sigma_i) \| p(\theta_i)) &= \\ &= \log(b - a) - \log(\sqrt{2\pi e} \sigma_i) - \log(\Phi(\beta_i) - \Phi(\alpha_i)) - \frac{\alpha_i \phi(\alpha_i) - \beta_i \phi(\beta_i)}{2(\Phi(\beta_i) - \Phi(\alpha_i))} \end{aligned}$$

## B Sampling from the truncated log-normal distribution

To sample  $\theta^i$  from the truncated log-normal distribution, we first sample  $\log \theta^i \sim \text{tN}(\log \theta^i | \mu_i, \sigma_i^2, a, b)$  and then take the exponent. In order to sample from the truncated normal distribution we use the inverse cumulative density function. The CDF for the truncated normal distribution is

$$F(x) = \frac{\Phi(\frac{x-\mu}{\sigma}) - \Phi(\frac{a-\mu}{\sigma})}{Z} = y$$

Hence inverse CDF can be written as

$$F^{-1}(y) = \mu + \sigma \Phi^{-1}\left(\Phi(\alpha) + Zy\right) = x$$

Sampling  $y$  from  $\mathcal{U}[0, 1]$  one can obtain  $x$  samples from truncated normal distribution. The final expression for the reparameterization trick for  $\theta \sim \log \text{tN}(\theta | \mu, \sigma^2, a, b)$  looks like this:

$$\theta = \exp \left\{ \mu + \sigma \Phi^{-1}\left(\Phi(\alpha) + Zy\right) \right\}, \text{ where } y \sim \mathcal{U}(y | a, b)$$

## C Mean of the truncated log-normal ditribution

Let's derive the expected value of  $\theta$ . In order to this, let's first find the PDF of the truncated log-normal distribution.

$$\begin{aligned} \text{tN}(x | \mu, \sigma^2, a, b) &= \frac{1}{Z\sqrt{2\pi\sigma^2}} \exp\left(-\frac{1}{2\sigma^2}(x - \mu)^2\right), \quad x \in [a, b], \\ \text{tN}(\log x | \mu, \sigma^2, a, b) d(\log x) &= \text{tN}(\log x | \mu, \sigma^2, a, b) \frac{dx}{x} = \text{LogN}_{[a, b]}(x | \mu, \sigma^2) dx \\ \text{LogN}_{[a, b]}(x | \mu, \sigma^2) &= \frac{1}{Zx\sqrt{2\pi\sigma^2}} \exp\left(-\frac{1}{2\sigma^2}(\log x - \mu)^2\right), \quad \log x \in [a, b], \quad x > 0 \end{aligned}$$

The obtained PDF is very similar to the log-normal distribution PDF. Hence,

$$\begin{aligned}\mathbb{E}\left[x \sim \text{LogN}_{[a,b]}(x \mid \mu, \sigma^2)\right] &= \frac{1}{Z} \int_{e^a}^{e^b} \frac{1}{\sqrt{2\pi\sigma^2}} \exp\left(-\frac{1}{2\sigma^2}(\log x - \mu)^2\right) dx = \\ &= \frac{1}{Z} \left[ \exp(\mu + \sigma^2/2) - \int_0^{e^a} \frac{1}{\sqrt{2\pi\sigma^2}} \exp\left(-\frac{1}{2\sigma^2}(\log x - \mu)^2\right) dx - \right. \\ &\quad \left. - \int_{e^b}^{+\infty} \frac{1}{\sqrt{2\pi\sigma^2}} \exp\left(-\frac{1}{2\sigma^2}(\log x - \mu)^2\right) dx \right]\end{aligned}$$

Now we need the formula for

$$\begin{aligned}p(a) &:= \int_a^\infty \frac{1}{\sqrt{2\pi\sigma^2}} \exp\left(-\frac{1}{2\sigma^2}(\log x - \mu)^2\right) dx \\ t &= \frac{\log x - \mu}{\sigma}, \quad x = e^{t\sigma + \mu}, \quad dx = e^{t\sigma + \mu} \sigma dt\end{aligned}$$

$$\begin{aligned}p(a) &= \int_{\frac{\log a - \mu}{\sigma}}^\infty \frac{1}{\sqrt{2\pi}} \exp\left(-\frac{1}{2}t^2 + t\sigma + \mu\right) dt = \int_{\frac{\log a - \mu}{\sigma}}^\infty \frac{1}{\sqrt{2\pi}} \exp\left(-\frac{1}{2}(t^2 - 2t\sigma + \sigma^2) + \frac{\sigma^2}{2} + \mu\right) dt = \\ &= \exp(\sigma^2/2 + \mu) \int_{\frac{\log a - \mu}{\sigma}}^\infty \frac{1}{\sqrt{2\pi}} \exp\left(-\frac{1}{2}(t - \sigma)^2\right) dt = \exp(\sigma^2/2 + \mu) \int_{\frac{\log a - \mu}{\sigma} - \sigma}^\infty \frac{1}{\sqrt{2\pi}} \exp\left(-\frac{1}{2}t^2\right) dt \\ p(a) &= \exp(\sigma^2/2 + \mu) \left(1 - \Phi\left(\frac{\log a - \mu}{\sigma} - \sigma\right)\right) = \exp(\sigma^2/2 + \mu) \Phi\left(\frac{\sigma^2 + \mu - \log a}{\sigma}\right)\end{aligned}$$

Using the derived formula, we finally obtain the expectation  $\mathbb{E}x$

$$\begin{aligned}\mathbb{E}\left[x \sim \text{LogN}_{[a,b]}(x \mid \mu, \sigma^2)\right] &= \\ &= \frac{1}{Z} \left[ \exp(\mu + \sigma^2/2) - [\exp(\mu + \sigma^2/2) - p(e^a)] - p(e^b) \right] \\ &= \frac{\exp(\mu + \sigma^2/2)}{Z} \left[ \Phi\left(\frac{\sigma^2 + \mu - a}{\sigma}\right) - \Phi\left(\frac{\sigma^2 + \mu - b}{\sigma}\right) \right]\end{aligned}$$

## D Signal-to-noise ratio of the truncated log-normal distribution

It is useful to calculate the signal-to-noise ratio  $\mathbb{E}x/\sqrt{\text{Var}(x)}$  for the truncated log-normal distribution in order to investigate the sparsity of the resulting layer. We need the variance  $\text{Var}(x)$  to calculate it.

$$\text{LogN}_{[a,b]}(x \mid \mu, \sigma^2) = \frac{1}{Zx\sqrt{2\pi\sigma^2}} \exp\left(-\frac{1}{2\sigma^2}(\log x - \mu)^2\right), \log x \in [a, b], x > 0$$

$$\begin{aligned}\text{Var}\left[x \sim \text{LogN}_{[a,b]}(x \mid \mu, \sigma^2)\right] &= \frac{1}{Z} \int_{e^a}^{e^b} \frac{(x - \mathbb{E}x)^2}{x\sqrt{2\pi\sigma^2}} \exp\left(-\frac{1}{2\sigma^2}(\log x - \mu)^2\right) dx = \\ &= \frac{1}{Z} \left[ \int_{e^a}^\infty \frac{(x - \mathbb{E}x)^2}{x\sqrt{2\pi\sigma^2}} \exp\left(-\frac{1}{2\sigma^2}(\log x - \mu)^2\right) dx - \int_{e^b}^\infty \frac{(x - \mathbb{E}x)^2}{x\sqrt{2\pi\sigma^2}} \exp\left(-\frac{1}{2\sigma^2}(\log x - \mu)^2\right) dx \right]\end{aligned}$$

So we have to calculate

$$\begin{aligned}p'(a) &:= \int_a^\infty \frac{(x - \mathbb{E}x)^2}{x\sqrt{2\pi\sigma^2}} \exp\left(-\frac{1}{2\sigma^2}(\log x - \mu)^2\right) dx \\ p'(a) &= \int_a^\infty \frac{x}{\sqrt{2\pi\sigma^2}} \exp\left(-\frac{1}{2\sigma^2}(\log x - \mu)^2\right) dx \\ &\quad - 2\mathbb{E}x \int_a^\infty \frac{1}{\sqrt{2\pi\sigma^2}} \exp\left(-\frac{1}{2\sigma^2}(\log x - \mu)^2\right) dx \\ &\quad + (\mathbb{E}x)^2 \int_a^\infty \frac{1}{x\sqrt{2\pi\sigma^2}} \exp\left(-\frac{1}{2\sigma^2}(\log x - \mu)^2\right) dx\end{aligned}$$

We already have the expression for  $p(a)$

$$p(a) = \int_a^\infty \frac{1}{\sqrt{2\pi\sigma^2}} \exp\left(-\frac{1}{2\sigma^2}(\log x - \mu)^2\right) dx = \exp(\sigma^2/2 + \mu) \Phi\left(\sigma - \frac{\log a - \mu}{\sigma}\right)$$

For the rest two summands we introduce a new variable  $t$ .

$$t = \frac{\log x - \mu}{\sigma}, \quad x = e^{t\sigma + \mu}, \quad dx = e^{t\sigma + \mu} \sigma dt$$

Next, we use  $t$  in a variable substitution.

$$\begin{aligned} \int_a^\infty \frac{x}{\sqrt{2\pi\sigma^2}} \exp\left(-\frac{1}{2\sigma^2}(\log x - \mu)^2\right) dx &= \int_{\frac{\log a - \mu}{\sigma}}^\infty \frac{1}{\sqrt{2\pi}} \exp\left(-\frac{1}{2}t^2 + 2t\sigma + 2\mu\right) dt = \\ &= \int_{\frac{\log a - \mu}{\sigma}}^\infty \frac{1}{\sqrt{2\pi}} \exp\left(-\frac{1}{2}(t^2 - 4t\sigma + 4\sigma^2) + 2\mu + 2\sigma^2\right) dt = \\ &= \exp(2\mu + 2\sigma^2) \int_{\frac{\log a - \mu}{\sigma}}^\infty \frac{1}{\sqrt{2\pi}} \exp\left(-\frac{1}{2}(t - 2\sigma)^2\right) dt = \exp(2\mu + 2\sigma^2) \int_{\frac{\log a - \mu}{\sigma} - 2\sigma}^\infty \frac{1}{\sqrt{2\pi}} \exp\left(-\frac{1}{2}t^2\right) dt = \\ &= \exp(2\mu + 2\sigma^2) \Phi\left(2\sigma - \frac{\log a - \mu}{\sigma}\right) \end{aligned}$$

$$\int_a^\infty \frac{1}{x\sqrt{2\pi\sigma^2}} \exp\left(-\frac{1}{2\sigma^2}(\log x - \mu)^2\right) dx = \int_{\frac{\log a - \mu}{\sigma}}^\infty \frac{1}{\sqrt{2\pi}} \exp\left(-\frac{1}{2}t^2\right) dt = \Phi\left(-\frac{\log a - \mu}{\sigma}\right)$$

Using the expression for  $\mathbb{E}x$  we obtain

$$p'(a) = \exp(2\mu + 2\sigma^2) \Phi\left(2\sigma - \frac{\log a - \mu}{\sigma}\right) - 2 \exp(\sigma^2/2 + \mu) \Phi\left(\sigma - \frac{\log a - \mu}{\sigma}\right) \mathbb{E}x + (\mathbb{E}x)^2 \Phi\left(-\frac{\log a - \mu}{\sigma}\right)$$

$$\begin{aligned} \text{Var}\left[x \sim \text{LogN}_{[a,b]}(x \mid \mu, \sigma^2)\right] &= \frac{1}{Z} \int_{e^a}^{e^b} \frac{(x - \mathbb{E}x)^2}{x\sqrt{2\pi\sigma^2}} \exp\left(-\frac{1}{2\sigma^2}(\log x - \mu)^2\right) dx = \\ &= \frac{\exp(2\mu + \sigma^2)}{Z} \left[ \exp(\sigma^2)(\Phi(2\sigma - \alpha) - \Phi(2\sigma - \beta)) \right. \\ &\quad \left. - \frac{2}{Z}(\Phi(\sigma - \alpha) - \Phi(\sigma - \beta))^2 + \frac{1}{Z^2}(\Phi(\sigma - \alpha) - \Phi(\sigma - \beta))^2(\Phi(-\alpha) - \Phi(-\beta)) \right] \\ &= \frac{\exp(2\mu + \sigma^2)}{Z} \left[ \exp(\sigma^2)(\Phi(2\sigma - \alpha) - \Phi(2\sigma - \beta)) - \frac{1}{Z}(\Phi(\sigma - \alpha) - \Phi(\sigma - \beta))^2 \right] \end{aligned}$$

Finally, we obtain the signal-to-noise ratio

$$\text{SNR}(x) = \frac{\mathbb{E}x}{\sqrt{\text{Var}(x)}} = \frac{\left[\Phi(\sigma - \alpha) - \Phi(\sigma - \beta)\right]}{\sqrt{Z \exp(\sigma^2)(\Phi(2\sigma - \alpha) - \Phi(2\sigma - \beta)) - (\Phi(\sigma - \alpha) - \Phi(\sigma - \beta))^2}}$$

## E Stable Computation of Statistics

Straightforward computation of the SNR and the mean of the truncated log-normal distribution can lead to indeterminate values like  $0 \cdot \infty$  when the values of  $\sigma$  are high. In order to make our calculations stable we use the scaled complementary error function  $\text{erfcx}(x) = \exp(x^2)\text{erfc}(x)$ . Given the equation

$$\Phi(a) - \Phi(b) = \frac{1}{2} \left[ \text{erf}\left(\frac{a}{\sqrt{2}}\right) - \text{erf}\left(\frac{b}{\sqrt{2}}\right) \right] = \frac{1}{2} \left[ \text{erfcx}\left(\frac{b}{\sqrt{2}}\right) \exp\left(-\frac{b^2}{2}\right) - \text{erfcx}\left(\frac{a}{\sqrt{2}}\right) \exp\left(-\frac{a^2}{2}\right) \right],$$

we can rewrite equations (19), (20) in the following form

$$\mathbb{E}\theta = \exp(\mu) \frac{1}{2Z} \left[ \operatorname{erfcx}\left(\frac{\sigma - \beta}{\sqrt{2}}\right) \exp\left(b - \mu - \frac{\beta^2}{2}\right) - \operatorname{erfcx}\left(\frac{\sigma - \alpha}{\sqrt{2}}\right) \exp\left(a - \mu - \frac{\alpha^2}{2}\right) \right]$$

$$\begin{aligned} \operatorname{SNR}(\theta) &= \frac{1}{\sqrt{D}} \left[ \operatorname{erfcx}\left(\frac{\sigma - \beta}{\sqrt{2}}\right) \exp\left(b - \mu - \frac{\beta^2}{2}\right) - \operatorname{erfcx}\left(\frac{\sigma - \alpha}{\sqrt{2}}\right) \exp\left(a - \mu - \frac{\alpha^2}{2}\right) \right], \\ D &= 2Z \left[ \operatorname{erfcx}\left(\frac{2\sigma - \beta}{\sqrt{2}}\right) \exp\left(2(b - \mu) - \frac{\beta^2}{2}\right) - \operatorname{erfcx}\left(\frac{2\sigma - \alpha}{\sqrt{2}}\right) \exp\left(2(a - \mu) - \frac{\alpha^2}{2}\right) \right] \\ &\quad - \left[ \operatorname{erfcx}\left(\frac{\sigma - \beta}{\sqrt{2}}\right) \exp\left(b - \mu - \frac{\beta^2}{2}\right) - \operatorname{erfcx}\left(\frac{\sigma - \alpha}{\sqrt{2}}\right) \exp\left(a - \mu - \frac{\alpha^2}{2}\right) \right] \end{aligned}$$
